# Supplementary material
Source: Springer Nature journal article supplement (https://www.springermedizin.de/resource/supplementary/12967_2014_1890_MOESM1_ESM.pdf/9575052)

Kaplan-Meier survival analysis

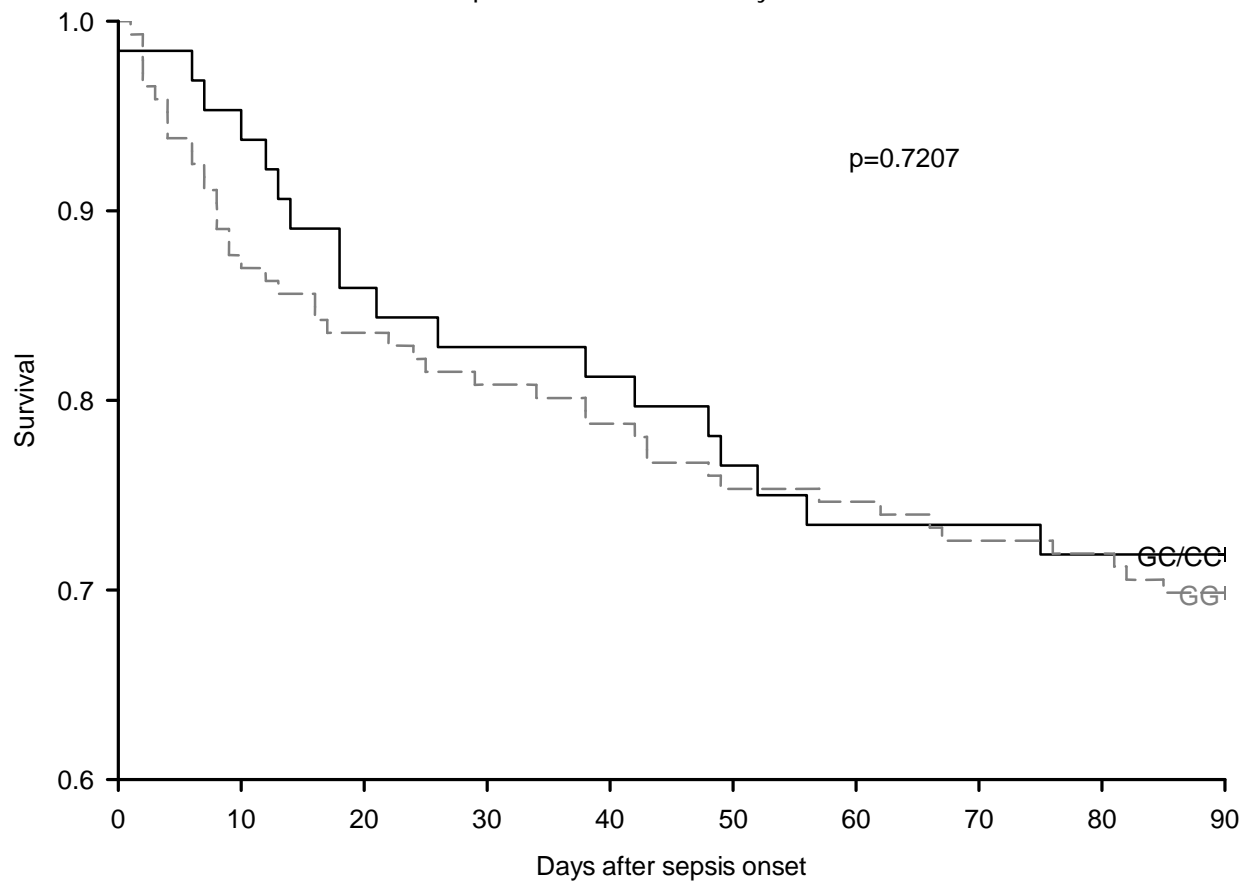

Supplement: MOESM1 [file 9575052]
